# Supplementary material for: Identification of chromosome ploidy and karyotype analysis of cherries (Prunus pseudocerasus Lindl.) in Guizhou
Source: PeerJ. 2024 Dec 16;12:e18668. doi: 10.7717/peerj.18668 (PMC11657202; doi:10.7717/peerj.18668)
Supplement: Supplemental Information 1 [file peerj-12-18668-s001.xls]

## Sheet: Sheet1
Exp. Mat. Name	Lc/Sc	Long./E	relatived length	MAR	MCI	> 2:1 rate	As.K(%)			Numerical order	Area	Mean	Min	Max	Length
MNH	2.01201	101.201	12.5	1.55	0.75	13	61.09			1	0.026	88.782	69.835	172	0.845
KS09	2.16	116.372	12.5	1.24	0.274992	0	54.9			2	0.024	87.28	72.492	169.667	0.781
WD2	2.14	113.501	12.5	1.35	0.294683	0	57.71			3	0.023	103.014	65.333	207.667	0.704
WD3	1.68	69.7896	12.5	1.23	0.138991	0	55.11			4	0.022	102.849	82.363	205.333	0.685
FHO2	2.4	140.394	12.5	1.32	0.284468	0	56.96			5	0.02	100.567	78.507	198.333	0.64
LZT11	1.64	63.9631	12.5	1.3	0.103116	0	56.56			6	0.023	102.295	72.232	192	0.705
LZT25	1.87	86.7118	12.5	1.41	0.222816	0	58.75			7	0.024	94.46	71.364	203.333	0.783
PZ27	1.76	76.2131	12.5	1.15	0.177736	0	53.74			8	0.022	106.063	84.373	198.333	0.685
PZ28	2	100.027	12.5	1.24	0.355423	0	55.48			9	0.022	108.202	60.814	243	0.677
PZ29	1.6	60.1357	12.5	1.25	0.159753	0	55.62			10	0.017	103.055	67.635	208	0.548
MT122	1.89	89.3705	12.5	1.38	0.263404	0	58.31			11	0.02	83.127	51.707	211.333	0.613
MT123	1.75	75.1357	12.5	1.29	0.14	0	56.43			12	0.019	99.181	65.036	215	0.585
MT124	2.04	103.578	12.5	1.31	0.2936	0	56.85			13	0.025	104.952	71.512	224	0.797
YQ129	1.73	72.6428	12.5	1.24	0.14	0	55.49			14	0.023	118.361	81	230	0.704
YQ130	2.06	106.274	12.5	1.46	0.608482	13	59.73			15	0.019	117.917	72.667	233	0.582
YQ131	2.22	121.517	12.5	1.37	0.281489	0	58.03			16	0.022	130.159	88.333	236	0.674
HZ139	2.01	100.796	12.5	1.26	0.115774	0	55.68			17	0.02	126.127	92.667	222.667	0.613
HZ144	2.05	105.335	12.5	1.42	0.16578	0	58.63			18	0.02	101.638	75.711	209	0.625
HZ145	2.44	144.143	12.5	1.43	0.165063	0	58.62			19	0.019	103.008	85.43	189.667	0.589
HZ152	2.65	164.696	12.5	1.56	0.57721	13	61.6			20	0.017	138.794	114.223	217.333	0.529
QX157	2.21	120.706	12.5	1.44	0.75185	13	59.3			21	0.018	88.693	58.566	218.333	0.552
QX158	1.82	81.6073	12.5	1.43	0.239725	0	59.02			22	0.021	93.833	58	243.333	0.643
QX159	1.79	79.4521	12.5	1.28	0.18	0	56.16			23	0.02	103.286	82.667	208.667	0.613
LZT5	1.74741	74.7411	12.5	1.20173	0.17	0	54.788			24	0.016	146.817	102.693	237.333	0.502
LZT12	2.44769	144.769	12.5	1.55356	0.605985	13	61.4147			25	0.019	87.477	53.246	223	0.604
LZT16	1.97104	97.104	12.5	1.43257	0.309628	0	59.0905			26	0.016	109.029	88.919	214.667	0.502
LZT23	2.54097	154.097	12.5	1.27075	0.156357	0	55.7949			27	0.017	106.429	61.429	234.333	0.542
PZ31	1.90945	90.9453	12.5	1.24328	0.243493	0	55.7011			28	0.019	87.088	65.339	155.333	0.583
										29	0.017	97.407	67.145	181.333	0.523
										30	0.019	100.146	74.107	221.333	0.595
										31	0.017	113.348	96.734	180	0.524
										32	0.017	104.757	82.261	210	0.524
										33	0.059	85.062	52.61	200.486	1.91
										34	0.051	80.229	48.154	141.824	1.653
										35	0.056	79.472	48.406	238.456	1.824
										36	0.051	69.27	43.246	169.343	1.646
										37	0.037	98.704	83.414	213.258	1.188
										38	0.031	90.785	64.528	218.272	0.981
										39	0.03	115.647	87.438	218.269	0.966
										40	0.031	110.889	89.04	242.219	0.984
										41	0.029	113.275	73.667	245.145	0.921
										42	0.033	87.149	54.512	239.071	1.051
										43	0.032	105.228	83.667	223.897	1.027
										44	0.032	96.051	68.089	226.315	1.018
										45	0.025	114.084	83.393	245.513	0.797
										46	0.027	96.309	73.731	237.025	0.858
										47	0.03	127.651	89	246.036	0.954
										48	0.027	118.758	90.599	254.423	0.858
										49	0.029	117.405	90.882	251.052	0.921
										50	0.027	93.367	68.787	238.993	0.86
										51	0.027	113.465	84.596	244.536	0.858
										52	0.03	98.957	62.897	246.722	0.95
										53	0.026	94.988	69.228	236.9	0.852
										54	0.024	124.752	95.333	244.643	0.768
										55	0.025	115.074	87.333	240.667	0.796
										56	0.026	114.917	98.175	214.096	0.841
										57	0.023	79.063	54.167	206.723	0.752
										58	0.028	75.623	39.829	206.23	0.897
										59	0.026	86.191	52.219	196.515	0.848
										60	0.023	100.361	65.333	234.667	0.704
										61	0.023	79.956	63.973	193.49	0.753
										62	0.022	106.211	75	243.339	0.678
										63	0.023	113.028	85.333	216.667	0.704
										64	0.022	96.277	80.097	188.779	0.693
